# Supplementary material for: In vitro biocompatibility of mesoporous metal (III; Fe, Al, Cr) trimesate MOF nanocarriers
Source: Royal Society of Chemistry journal article supplement (doi:10.1039/c5tb01223f), 2015-01-01

**Supplementary Figure 1. MIL100 internalization into the cells.** Flow cytometry (A) and confocal microscopy (B) analyses of MIL-100(Fe) NPs loaded with Furazan. Calu-3 cells were exposed to NPs at two dose levels for 2 and 24 h.

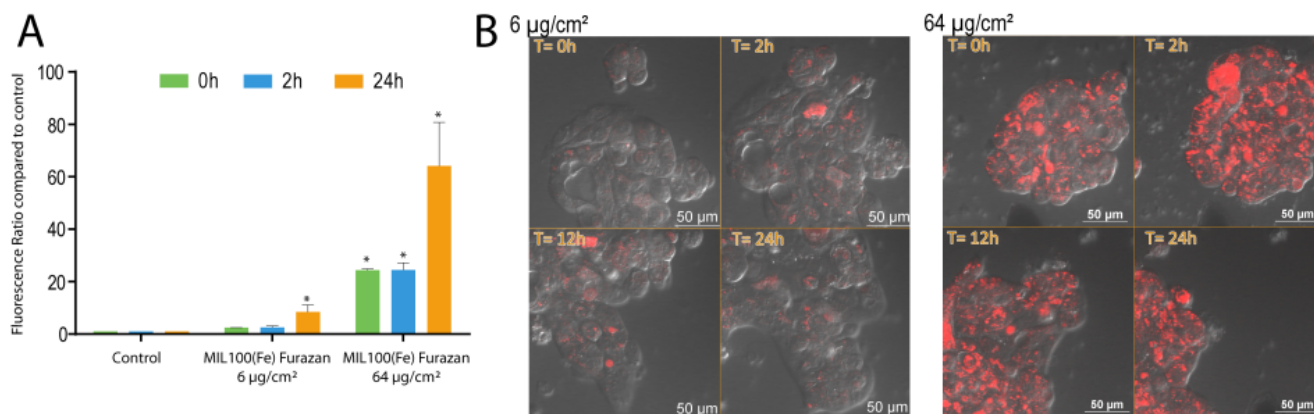

Supplement: c5tb01223f1.pdf [file c5tb01223f1.pdf]
